# Supplementary material
Source: PubMed Central journal article supplement (PMC3746872)
Supplement: 1311770110_sapp.pdf [file 1311770110_sapp.pdf]

## Supplementary data

**Table S1: DKQ up, K37Q up**

| Gene Accession | Symbol   | Definition                                                                                   |
|----------------|----------|----------------------------------------------------------------------------------------------|
| NM_001695.4    | ATP6V1C1 | Homo sapiens ATPase, H+ transporting, lysosomal 42kDa, V1 subunit C1 (ATP6V1C1), mRNA.       |
| NR_002786.1    | CIDECP   | Homo sapiens cell death-inducing DFFA-like effector c pseudogene (CIDECP), non-coding RNA.   |
| NR_001561.1    | CYCSL1   | Homo sapiens cytochrome c, somatic-like 1 (CYCSL1) on chromosome 6.                          |
| NM_182833.1    | GDPD4    | Homo sapiens glycerophosphodiester phosphodiesterase domain containing 4 (GDPD4), mRNA.      |
| NM_001524.1    | HCRT     | Homo sapiens hypocretin (orexin) neuropeptide precursor (HCRT), mRNA.                        |
| NM_001098516.1 | MUC20    | Homo sapiens mucin 20, cell surface associated (MUC20), transcript variant S, mRNA.          |
| NM_001042522.1 | SPRED3   | Homo sapiens sprouty-related, EVH1 domain containing 3 (SPRED3), transcript variant 1, mRNA. |
| NM_012464.3    | TLL1     | Homo sapiens tolloid-like 1 (TLL1), mRNA.                                                    |
| NM_178520.2    | TMEM105  | Homo sapiens transmembrane protein 105 (TMEM105), mRNA.                                      |
| NM_003432.1    | ZNF131   | Homo sapiens zinc finger protein 131 (ZNF131), mRNA.                                         |

**Table S2 : DKQ up, K37 Q down**

| Gene Accession | Symbol  | Definition                                                                                         |
|----------------|---------|----------------------------------------------------------------------------------------------------|
| NM_004270.3    | CRSP9   | Homo sapiens cofactor required for Sp1 transcriptional activation, subunit 9, 33kDa (CRSP9), mRNA. |
| NM_001005340.1 | GPNMB   | Homo sapiens glycoprotein (transmembrane) nmb (GPNMB), transcript variant 1, mRNA.                 |
| NM_014552.2    | GRHL1   | Homo sapiens grainyhead-like 1 (Drosophila) (GRHL1), transcript variant 1, mRNA.                   |
| NM_002217.3    | ITIH3   | Homo sapiens inter-alpha (globulin) inhibitor H3 (ITIH3), mRNA.                                    |
| NM_033347.1    | KCNK7   | Homo sapiens potassium channel, subfamily K, member 7 (KCNK7), transcript variant A, mRNA.         |
| NM_145800.2    | SEPTIN6 | Homo sapiens septin 6 (SEPT6), transcript variant III, mRNA.                                       |
| NM_018128.4    | TSR1    | Homo sapiens TSR1, 20S rRNA accumulation, homolog (S. cerevisiae) (TSR1), mRNA.                    |
| NM_006624.3    | ZMYND11 | Homo sapiens zinc finger, MYND domain containing 11 (ZMYND11), transcript variant 1, mRNA.         |

**Table S3: DKQ up, K37 Q unchanged**

| Gene Accession | Symbol   | Definition                                                                                                                                            |
|----------------|----------|-------------------------------------------------------------------------------------------------------------------------------------------------------|
| NM_199162.1    | ADPRHL1  | Homo sapiens ADP-ribosylhydrolase like 1 (ADPRHL1), transcript variant 2, mRNA.                                                                       |
| NM_001153.2    | ANXA4    | Homo sapiens annexin A4 (ANXA4), mRNA.                                                                                                                |
| NM_199077.1    | CNNM2    | Homo sapiens cyclin M2 (CNNM2), transcript variant 3, mRNA.                                                                                           |
| NM_001546.2    | ID4      | Homo sapiens inhibitor of DNA binding 4, dominant negative helix-loop-helix protein (ID4), mRNA.                                                      |
| NM_014790.3    | JAKMIP2  | Homo sapiens janus kinase and microtubule interacting protein 2 (JAKMIP2), mRNA.                                                                      |
| NM_199464.1    | KCNRG    | Homo sapiens potassium channel regulator (KCNRG), transcript variant 2, mRNA.                                                                         |
| NM_002312.3    | LIG4     | Homo sapiens ligase IV, DNA, ATP-dependent (LIG4), transcript variant 1, mRNA.                                                                        |
| NM_001038603.1 | MARVELD2 | Homo sapiens MARVEL domain containing 2 (MARVELD2), transcript variant 1, mRNA.                                                                       |
| NM_002466.2    | MYBL2    | Homo sapiens v-myb myeloblastosis viral oncogene homolog (avian)-like 2 (MYBL2), mRNA.                                                                |
| NM_001029884.1 | PLEKHG1  | Homo sapiens pleckstrin homology domain containing, family G (with RhoGef domain) member 1 (PLEKHG1), mRNA.                                           |
| NM_015723.2    | PNPLA8   | Homo sapiens patatin-like phospholipase domain containing 8 (PNPLA8), mRNA.                                                                           |
| NM_003069.2    | SMARCA1  | Homo sapiens SWI/SNF related, matrix associated, actin dependent regulator of chromatin, subfamily a, member 1 (SMARCA1), transcript variant 1, mRNA. |

**Table S4: DKQ down, K37Q up**

| Gene Accession | Symbol  | Definition                                                                                                 |
|----------------|---------|------------------------------------------------------------------------------------------------------------|
| NM_002982.3    | CCL2    | Homo sapiens chemokine (C-C motif) ligand 2 (CCL2), mRNA.                                                  |
| NM_001001391.1 | CD44    | Homo sapiens CD44 molecule (Indian blood group) (CD44), transcript variant 4, mRNA.                        |
| NM_001781.1    | CD69    | Homo sapiens CD69 molecule (CD69), mRNA.                                                                   |
| NM_001511.1    | CXCL1   | Homo sapiens chemokine (C-X-C motif) ligand 1 (melanoma growth stimulating activity, alpha) (CXCL1), mRNA. |
| NM_002089.3    | CXCL2   | Homo sapiens chemokine (C-X-C motif) ligand 2 (CXCL2), mRNA.                                               |
| NM_002994.3    | CXCL5   | Homo sapiens chemokine (C-X-C motif) ligand 5 (CXCL5), mRNA.                                               |
| NM_000584.2    | IL8     | Homo sapiens interleukin 8 (IL8), mRNA.                                                                    |
| NM_002960.1    | S100A3  | Homo sapiens S100 calcium binding protein A3 (S100A3), mRNA.                                               |
| NM_016562.3    | TLR7    | Homo sapiens toll-like receptor 7 (TLR7), mRNA.                                                            |
| NM_000594.2    | TNF     | Homo sapiens tumor necrosis factor (TNF superfamily, member 2) (TNF), mRNA.                                |
| NM_001561.4    | TNFRSF9 | Homo sapiens tumor necrosis factor receptor superfamily, member 9 (TNFRSF9), mRNA.                         |
| NM_033229.2    | TRIM15  | Homo sapiens tripartite motif-containing 15 (TRIM15), mRNA.                                                |

**Table S5: DKQ down, K37Q down**

| Gene Accession | Symbol  | Definition                                                                                                    |
|----------------|---------|---------------------------------------------------------------------------------------------------------------|
| NM_019052.2    | CCHCR1  | Homo sapiens coiled-coil alpha-helical rod protein 1 (CCHCR1), mRNA.                                          |
| NM_006727.2    | CDH10   | Homo sapiens cadherin 10, type 2 (T2-cadherin) (CDH10), mRNA.                                                 |
| NM_001565.2    | CXCL10  | Homo sapiens chemokine (C-X-C motif) ligand 10 (CXCL10), mRNA.                                                |
| NM_000780.2    | CYP7A1  | Homo sapiens cytochrome P450, family 7, subfamily A, polypeptide 1 (CYP7A1), mRNA.                            |
| NM_203429.1    | DSCR8   | Homo sapiens Down syndrome critical region gene 8 (DSCR8), transcript variant 3, mRNA.                        |
| NM_004120.3    | GBP2    | Homo sapiens guanylate binding protein 2, interferon-inducible (GBP2), mRNA.                                  |
| NM_021067.3    | GINS1   | Homo sapiens GINS complex subunit 1 (Psf1 homolog) (GINS1), mRNA.                                             |
| NM_002120.3    | HLA-DOB | Homo sapiens major histocompatibility complex, class II, DO beta (HLA-DOB), mRNA.                             |
| NM_000864.3    | HTR1D   | Homo sapiens 5-hydroxytryptamine (serotonin) receptor 1D (HTR1D), mRNA.                                       |
| NM_005531.1    | IFI16   | Homo sapiens interferon, gamma-inducible protein 16 (IFI16), mRNA.                                            |
| NM_022168.2    | IFIH1   | Homo sapiens interferon induced with helicase C domain 1 (IFIH1), mRNA.                                       |
| NM_001033112.1 | PAIP2   | Homo sapiens poly(A) binding protein interacting protein 2 (PAIP2), transcript variant 1, mRNA.               |
| NM_133509.2    | RAD51L1 | Homo sapiens RAD51-like 1 ( <i>S. cerevisiae</i> ) (RAD51L1), transcript variant 3, mRNA.                     |
| NM_014331.3    | SLC7A11 | Homo sapiens solute carrier family 7, (cationic amino acid transporter, y+ system) member 11 (SLC7A11), mRNA. |
| NM_000361.2    | THBD    | Homo sapiens thrombomodulin (THBD), mRNA.                                                                     |

**Table S6: DKQ down, K37Q unchanged**

| Gene Accession | Symbol   | Definition                                                                                                             |
|----------------|----------|------------------------------------------------------------------------------------------------------------------------|
| NM_005623.2    | CCL8     | Homo sapiens chemokine (C-C motif) ligand 8 (CCL8), mRNA.                                                              |
| NM_001040280.1 | CD83     | Homo sapiens CD83 molecule (CD83), transcript variant 2, mRNA.                                                         |
| NM_001080848.1 | CSAG3B   | Homo sapiens CSAG family, member 3B (CSAG3B), mRNA.                                                                    |
| NM_001080426.1 | DUSP27   | Homo sapiens dual specificity phosphatase 27 (putative) (DUSP27), mRNA.                                                |
| NM_004428.2    | EFNA1    | Homo sapiens ephrin-A1 (EFNA1), transcript variant 1, mRNA.                                                            |
| NM_013365.3    | GGA1     | Homo sapiens golgi associated, gamma adaptin ear containing, ARF binding protein 1 (GGA1), transcript variant 1, mRNA. |
| NM_022081.4    | HPS4     | Homo sapiens Hermansky-Pudlak syndrome 4 (HPS4), transcript variant 1, mRNA.                                           |
| NM_003897.3    | IER3     | Homo sapiens immediate early response 3 (IER3), mRNA.                                                                  |
| NM_005204.2    | MAP3K8   | Homo sapiens mitogen-activated protein kinase kinase kinase 8 (MAP3K8), mRNA.                                          |
| NM_001085.4    | SERPINA3 | Homo sapiens serpin peptidase inhibitor, clade A (alpha-1 antiproteinase, antitrypsin), member 3 (SERPINA3), mRNA.     |
| NM_003255.4    | TIMP2    | Homo sapiens TIMP metalloproteinase inhibitor 2 (TIMP2), mRNA.                                                         |
| NM_001078.2    | VCAM1    | Homo sapiens vascular cell adhesion molecule 1 (VCAM1), transcript variant 1, mRNA.                                    |

**Table S7: DKQ unchanged, K37Q up**

| Gene Accession | Symbol  | Definition                                                                                                      |
|----------------|---------|-----------------------------------------------------------------------------------------------------------------|
| NM_024899.2    | CEP76   | Homo sapiens centrosomal protein 76kDa (CEP76), mRNA.                                                           |
| NM_080760.3    | DACH1   | Homo sapiens dachshund homolog 1 (Drosophila) (DACH1), transcript variant 2, mRNA.                              |
| NM_002229.2    | JUNB    | Homo sapiens jun B proto-oncogene (JUNB), mRNA.                                                                 |
| NM_178587.1    | PPP2R5C | Homo sapiens protein phosphatase 2, regulatory subunit B', gamma isoform (PPP2R5C), transcript variant 3, mRNA. |
| NM_017730.2    | QRICH1  | Homo sapiens glutamine-rich 1 (QRICH1), transcript variant 1, mRNA.                                             |
| NM_001010935.1 | RAP1A   | Homo sapiens RAP1A, member of RAS oncogene family (RAP1A), transcript variant 1, mRNA.                          |
| NM_147156.3    | SGMS1   | Homo sapiens sphingomyelin synthase 1 (SGMS1), mRNA.                                                            |
| NM_004694.3    | SLC16A6 | Homo sapiens solute carrier family 16, member 6 (monocarboxylic acid transporter 7) (SLC16A6), mRNA.            |
| NM_014258.2    | SYCP2   | Homo sapiens synaptonemal complex protein 2 (SYCP2), mRNA.                                                      |
| NM_025079.1    | ZC3H12A | Homo sapiens zinc finger CCCH-type containing 12A (ZC3H12A), mRNA.                                              |

**Table S8: DKQ unchanged, K37Q down**

| Gene Accession | Symbol    | Definition                                                                  |
|----------------|-----------|-----------------------------------------------------------------------------|
| NM_198440.2    | DERL3     | Homo sapiens Der1-like domain family, member 3                              |
| NR_002793.1    | LOC220115 | Homo sapiens TPTE and PTEN homologous inositol lipid phosphatase pseudogene |
| NM_138796.2    | SPATA17   | Homo sapiens spermatogenesis associated 17                                  |
| NM_003126.2    | SPTA1     | Homo sapiens spectrin, alpha, erythrocytic 1 (elliptocytosis 2)             |
| NM_001077511.1 | TCF19     | Homo sapiens transcription factor 19 (TCF19), transcript variant 2          |
| NM_012263.3    | TTLL1     | Homo sapiens tubulin tyrosine ligase-like family, member 1                  |

**Table S9: DKQ unchanged, K37Q unchanged**

| <b>Gene Accession</b> | <b>Symbol</b> | <b>Definition</b>                                                                                                 |
|-----------------------|---------------|-------------------------------------------------------------------------------------------------------------------|
| NM_020371.2           | AVEN          | Homo sapiens apoptosis, caspase activation inhibitor (AVEN), mRNA.                                                |
| NM_004331.2           | BNIP3L        | Homo sapiens BCL2/adenovirus E1B 19kDa interacting protein 3-like (BNIP3L), mRNA.                                 |
| NM_001039933.1        | CD79B         | Homo sapiens CD79b molecule, immunoglobulin-associated beta (CD79B), transcript variant 3, mRNA.                  |
| NM_198066.2           | GNPNAT1       | Homo sapiens glucosamine-phosphate N-acetyltransferase 1 (GNPNAT1), mRNA.                                         |
| NM_000839.2           | GRM2          | Homo sapiens glutamate receptor, metabotropic 2 (GRM2), mRNA.                                                     |
| NM_024659.2           | GTDC1         | Homo sapiens glycosyltransferase-like domain containing 1 (GTDC1), transcript variant 2, mRNA.                    |
| NM_016315.2           | GULP1         | Homo sapiens GULP, engulfment adaptor PTB domain containing 1 (GULP1), mRNA.                                      |
| NM_130760.2           | MADCAM1       | Homo sapiens mucosal vascular addressin cell adhesion molecule 1 (MADCAM1), transcript variant 1, mRNA.           |
| NM_003629.2           | PIK3R3        | Homo sapiens phosphoinositide-3-kinase, regulatory subunit 3 (p55, gamma) (PIK3R3), mRNA.                         |
| NM_000963.1           | PTGS2         | Homo sapiens prostaglandin-endoperoxide synthase 2 (prostaglandin G/H synthase and cyclooxygenase) (PTGS2), mRNA. |
| NM_002841.2           | PTPRG         | Homo sapiens protein tyrosine phosphatase, receptor type, G (PTPRG), mRNA.                                        |
| NM_031309.4           | SCRT1         | Homo sapiens scratch homolog 1, zinc finger protein (Drosophila) (SCRT1), mRNA.                                   |
| NM_000543.3           | SMPD1         | Homo sapiens sphingomyelin phosphodiesterase 1, acid lysosomal (SMPD1), transcript variant ASM-1, mRNA.           |
| NM_006662.2           | SRCAP         | Homo sapiens Snf2-related CREBBP activator protein (SRCAP), mRNA.                                                 |
| NM_152858.1           | WTAP          | Homo sapiens Wilms tumor 1 associated protein (WTAP), transcript variant 3, mRNA.                                 |
